# Supplementary material for: Improved Malaria Case Management through the Implementation of a Health Facility-Based Sentinel Site Surveillance System in Uganda
Source: PLOS journal article supplement (doi:10.1371/journal.pone.0016316), 2011-01-19
Supplement: S1 (10.1371/journal.pone.0016316.s001) [file journal.pone.0016316.s001]

Patient Record Form

Clinic \_\_\_\_\_

|                        |                     |                           |                                                                      |                                                                            |
|------------------------|---------------------|---------------------------|----------------------------------------------------------------------|----------------------------------------------------------------------------|
| Date<br>____/____/____ | OPD Number<br>_____ | Patient's Last Name       | First Name                                                           | New attendance<br><input type="checkbox"/> Yes <input type="checkbox"/> No |
| Parish                 | Village             | Age:<br>____ Yrs ____ Mos | Sex <input type="checkbox"/> Male<br><input type="checkbox"/> Female | Weight<br>____ kg                                                          |

| History & Exam findings                                                             |                                                                                                                                      |
|-------------------------------------------------------------------------------------|--------------------------------------------------------------------------------------------------------------------------------------|
| Fever or history of fever? <input type="checkbox"/> Yes <input type="checkbox"/> No | History of cough ≥ 2 weeks? <input type="checkbox"/> Yes <input type="checkbox"/> No <b>(BOTH these questions must be completed)</b> |
|                                                                                     |                                                                                                                                      |
|                                                                                     |                                                                                                                                      |
|                                                                                     |                                                                                                                                      |

|                                                                                                                                                                                                                                                                              |                                                                                                                      |                                                                                                                                                                                                                                                                                                                                                                            |
|------------------------------------------------------------------------------------------------------------------------------------------------------------------------------------------------------------------------------------------------------------------------------|----------------------------------------------------------------------------------------------------------------------|----------------------------------------------------------------------------------------------------------------------------------------------------------------------------------------------------------------------------------------------------------------------------------------------------------------------------------------------------------------------------|
| <input type="checkbox"/> BS for Malaria <input type="checkbox"/> Pos <input type="checkbox"/> Neg<br>Parasite density: _____ (if positive)<br><input type="checkbox"/> RDT for Malaria <input type="checkbox"/> Pos <input type="checkbox"/> Neg<br>Malaria Lab number _____ | <input type="checkbox"/> HIV test <input type="checkbox"/> CTRR <input type="checkbox"/> CTR<br>HIV Lab number _____ | <input type="checkbox"/> TB exam:<br>1 <sup>st</sup> smear <input type="checkbox"/> Pos <input type="checkbox"/> Neg (today's date)<br>2 <sup>nd</sup> smear <input type="checkbox"/> Pos <input type="checkbox"/> Neg Date: ____/____/____<br>3 <sup>rd</sup> smear <input type="checkbox"/> Pos <input type="checkbox"/> Neg Date: ____/____/____<br>TB Lab number _____ |
| <input type="checkbox"/> Stool ordered - Results:                                                                                                                                                                                                                            | <input type="checkbox"/> Urinalysis ordered - Results:                                                               | <input type="checkbox"/> Hb _____ g/dl<br><input type="checkbox"/> VDRL test <input type="checkbox"/> Pos <input type="checkbox"/> Neg<br><input type="checkbox"/> Other (test/result)                                                                                                                                                                                     |

| Diagnosis (Check all that apply)                      |                                                           |                                                           |                                                           |
|-------------------------------------------------------|-----------------------------------------------------------|-----------------------------------------------------------|-----------------------------------------------------------|
| <b>Reportable diseases</b>                            | <input type="checkbox"/> Malaria (not during pregnancy)   | <input type="checkbox"/> Animal and Snake bites           | <input type="checkbox"/> Haemorrhage during pregnancy     |
| <input type="checkbox"/> Acute flaccid paralysis      | <input type="checkbox"/> Malaria (during pregnancy)       | <input type="checkbox"/> Asthma                           | <input type="checkbox"/> High BP during pregnancy         |
| <input type="checkbox"/> Cholera                      | <input type="checkbox"/> Meningitis (Non meningococcal)   | <input type="checkbox"/> Cardiovascular- High BP          | <input type="checkbox"/> Obstructed labour                |
| <input type="checkbox"/> Dysentery                    | <input type="checkbox"/> Onchocerciasis                   | <input type="checkbox"/> Cardiovascular- Other            | <input type="checkbox"/> Perinatal conditions in newborns |
| <input type="checkbox"/> Guinea worm                  | <input type="checkbox"/> Pelvic Inflammatory Disease      | <input type="checkbox"/> Childhood mental disorder        | <b>Miscellaneous Diseases</b>                             |
| <input type="checkbox"/> Hemorrhagic fever            | <input type="checkbox"/> Pneumonia                        | <input type="checkbox"/> Diabetes Mellitus                | <input type="checkbox"/> Death in OPD (no diagnosis)      |
| <input type="checkbox"/> Measles                      | <input type="checkbox"/> Schistosomiasis                  | <input type="checkbox"/> Epilepsy                         | <input type="checkbox"/> ENT Conditions                   |
| <input type="checkbox"/> Meningitis (Meningococcal)   | <input type="checkbox"/> Sleeping Sickness                | <input type="checkbox"/> GI disorders (non infective)     | <input type="checkbox"/> Eye Conditions                   |
| <input type="checkbox"/> Plague                       | <input type="checkbox"/> STI                              | <input type="checkbox"/> Injuries- Road traffic accidents | <input type="checkbox"/> Skin Conditions                  |
| <input type="checkbox"/> Rabies                       | <input type="checkbox"/> Tetanus (over 28 days age)       | <input type="checkbox"/> Injuries- Trauma of other origin | <input type="checkbox"/> Oral Diseases and conditions     |
| <input type="checkbox"/> Tetanus (0-28 days age)      | <input type="checkbox"/> Typhoid Fever                    | <input type="checkbox"/> Malnutrition- low weight for age | <input type="checkbox"/> Illegible or unclear             |
| <input type="checkbox"/> Yellow Fever                 | <input type="checkbox"/> Urinary Tract Infections (UTI)   | <input type="checkbox"/> Malnutrition- severe             | <b>Other Diagnosis</b>                                    |
| <b>Infectious Disease</b>                             | <b>Tuberculosis</b>                                       | <input type="checkbox"/> Mental Illness- Anxiety          |                                                           |
| <input type="checkbox"/> AIDS/HIV                     | <input type="checkbox"/> New case – No prior TB treatment | <input type="checkbox"/> Mental Illness- Depression       |                                                           |
| <input type="checkbox"/> Cough or Cold (no pneumonia) | <input type="checkbox"/> New case – Previous TB treatment | <input type="checkbox"/> Mental Illness- Mania            |                                                           |
| <input type="checkbox"/> Diarrhea- Acute              | <input type="checkbox"/> Known TB Case – Med Refill       | <input type="checkbox"/> Mental Illness- Schizophrenia    |                                                           |
| <input type="checkbox"/> Diarrhea- Persistent         | <b>Non Infectious Diseases</b>                            | <input type="checkbox"/> Mental Illness- Other            |                                                           |
| <input type="checkbox"/> Intestinal worms             | <input type="checkbox"/> Alcohol and drug abuse           | <b>Maternal and Perinatal Diseases</b>                    |                                                           |
| <input type="checkbox"/> Leprosy                      | <input type="checkbox"/> Anaemia                          | <input type="checkbox"/> Abortions                        |                                                           |

| Treatment (Check all that apply)         |      |                                         |      |
|------------------------------------------|------|-----------------------------------------|------|
| Drug                                     | Dose | Drug                                    | Dose |
| Antimalarial                             |      | Other Drugs                             |      |
| <input type="checkbox"/> Coartem         |      | <input type="checkbox"/> Aspirin        |      |
| <input type="checkbox"/> Quinine         |      | <input type="checkbox"/> Cough linctus  |      |
| <input type="checkbox"/> Chloroquine     |      | <input type="checkbox"/> Diazepam       |      |
| <input type="checkbox"/> Amodiaquine     |      | <input type="checkbox"/> Dexamethasone  |      |
| <input type="checkbox"/> SP              |      | <input type="checkbox"/> Diclofenac     |      |
| <input type="checkbox"/> Artesunate      |      | <input type="checkbox"/> Folic Acid     |      |
| <input type="checkbox"/> Duocotexin      |      | <input type="checkbox"/> Gentian violet |      |
| Antimicrobials                           |      | <input type="checkbox"/> Hydrocortisone |      |
| <input type="checkbox"/> Albendazole     |      | <input type="checkbox"/> Ibuprofen      |      |
| <input type="checkbox"/> Amoxicillin     |      | <input type="checkbox"/> Magnesium      |      |
| <input type="checkbox"/> Chloramphenicol |      | <input type="checkbox"/> Multivitamin   |      |
| <input type="checkbox"/> Ciprofloxacin   |      | <input type="checkbox"/> Nystatin       |      |
| <input type="checkbox"/> Cloxacillin     |      | <input type="checkbox"/> Paracetamol    |      |
| <input type="checkbox"/> Cotrimoxazole   |      | <input type="checkbox"/> Phenytoin      |      |
| <input type="checkbox"/> Doxycycline     |      | <input type="checkbox"/> Pirlton        |      |
| <input type="checkbox"/> Erythromycin    |      | <input type="checkbox"/> Salbutamol     |      |
| <input type="checkbox"/> Gentamicin      |      | <input type="checkbox"/> Vit. B group   |      |
| <input type="checkbox"/> Mebendazole     |      | Other                                   |      |
| <input type="checkbox"/> Metronidazole   |      | Other                                   |      |
| <input type="checkbox"/> PPF             |      | Other                                   |      |
| <input type="checkbox"/> Tetracycline    |      | Other                                   |      |
| <input type="checkbox"/> X-pen           |      | Other                                   |      |

| Referrals and additional notes                       |       | TB Drug Regimen (Check if prescribed)                                                     |  |
|------------------------------------------------------|-------|-------------------------------------------------------------------------------------------|--|
| <input type="checkbox"/> Admitted to ward            | Notes | <input type="checkbox"/> Initial Phase                                                    |  |
| <input type="checkbox"/> Referred to HIV care        |       | <input type="checkbox"/> RHZE <input type="checkbox"/> RHZES <input type="checkbox"/> RHZ |  |
| <input type="checkbox"/> Referred for TB care        |       | <input type="checkbox"/> Continuation Phase                                               |  |
| <input type="checkbox"/> Referred for other services |       | <input type="checkbox"/> HE <input type="checkbox"/> RHE <input type="checkbox"/> RH      |  |

Full Name

Signature
